# Supplementary material for: St Gallen molecular subtypes in feline mammary carcinoma and paired metastases—disease progression and clinical implications from a 3-year follow-up study
Source: Springer Nature journal article supplement (doi:10.1007/s13277-015-4251-z), 2015-10-20
Supplement: MOESM1 [file 9260744]

Table S1. Univariate analysis of overall survival and disease-free survival in 42 queens with mammary carcinoma, according to ER/PR/HER2 status, CK 5/6 expression and Ki-67 index.

|  | OS Mean (±SE) | OS Median (±SE) | *p* | DFS Mean  (±SE) | DFS Median  (±SE) | *p* |
| --- | --- | --- | --- | --- | --- | --- |
| ER status |  |  | 0.04* |  |  | 0.524 |
| Negative | 480.1 (±77.1) | 345 (±45.4) |  | 277.9 (±44.9) | 259 (±32) |  |
| Positive | 843.3 (±133.5) | 488 (±276.22) |  | 337.6 (±58.1) | 315 (±117.4) |  |
| PR status |  |  | 0.92 |  |  | 0.62 |
| Negative | 568.1 (±120.5) | 328 (±41.7) |  | 254.7 (±55.4) | 286 (±76.7) |  |
| Positive | 589.3 (±91) | 479 (±71.3) |  | 304.6 (±45.4) | 266 (±24.3) |  |
| *f*HER2 status |  |  | 0.414 |  |  | 0.324 |
| Negative | 599.3 (±93.4) | 505 (±110.3) |  | 308 (±42.6) | 286 (±43.8) |  |
| Positive | 397.9 (±61.2) | 345 (±112.5) |  | 242.7 (±68.7) | 209 (±38.3) |  |
| CK 5/6 expression |  |  | 0.022* |  |  | 0.781 |
| Negative | 736.3 (±117.3) | 505 (±198.2) |  | 310.8 (±45.1) | 286 (±20.4) |  |
| Positive | 363 (±55.4) | 325 (±63) |  | 266.8 (±59.6) | 243 (±147.1) |  |
| Ki67 index |  |  | 0.011* |  |  | 0.102 |
| High | 404.5 (±61.7) | 328 (±29.6) |  | 232.4 (±30) | 266 (±21.6) |  |
| Low | 859.8 (±145.1) | 716 (±204.4) |  | 364.4 (±71.2) | 340 (±118) |  |
